# Supplementary material for: Association of Blood Pressure With Stroke Risk in Chinese Population: A 6-Year Prospective Cohort Study
Source: Research Square preprint supplement (doi:10.21203/rs.3.rs-583220/v1), 2021-06-09
Supplement: Supplementary file 1 [file 9887199ec7e9fdf56ee03752.docx]

**Association of Blood Pressure With Stroke Risk in Chinese Population: A 6-Year Prospective Cohort Study**

Qi Yu1

Qing-Dong Jin2*

Yan-Qing Chen1

Xin-Ru Liu1

Qing-Ying Lin1

1. Department of Scientific Research and Education, the First Hospital of Putian, Putain city, Fujian province, China
2. Department of Neurosurgery, the First Hospital of Putian, Putain city, Fujian province, China

Correspondence to:

Qing-Dong Jin, Department of Neurosurgery, the First Hospital of Putian, Putain city, Fujian province, China. E-mail: jqd2007@126.com

**Appendix**


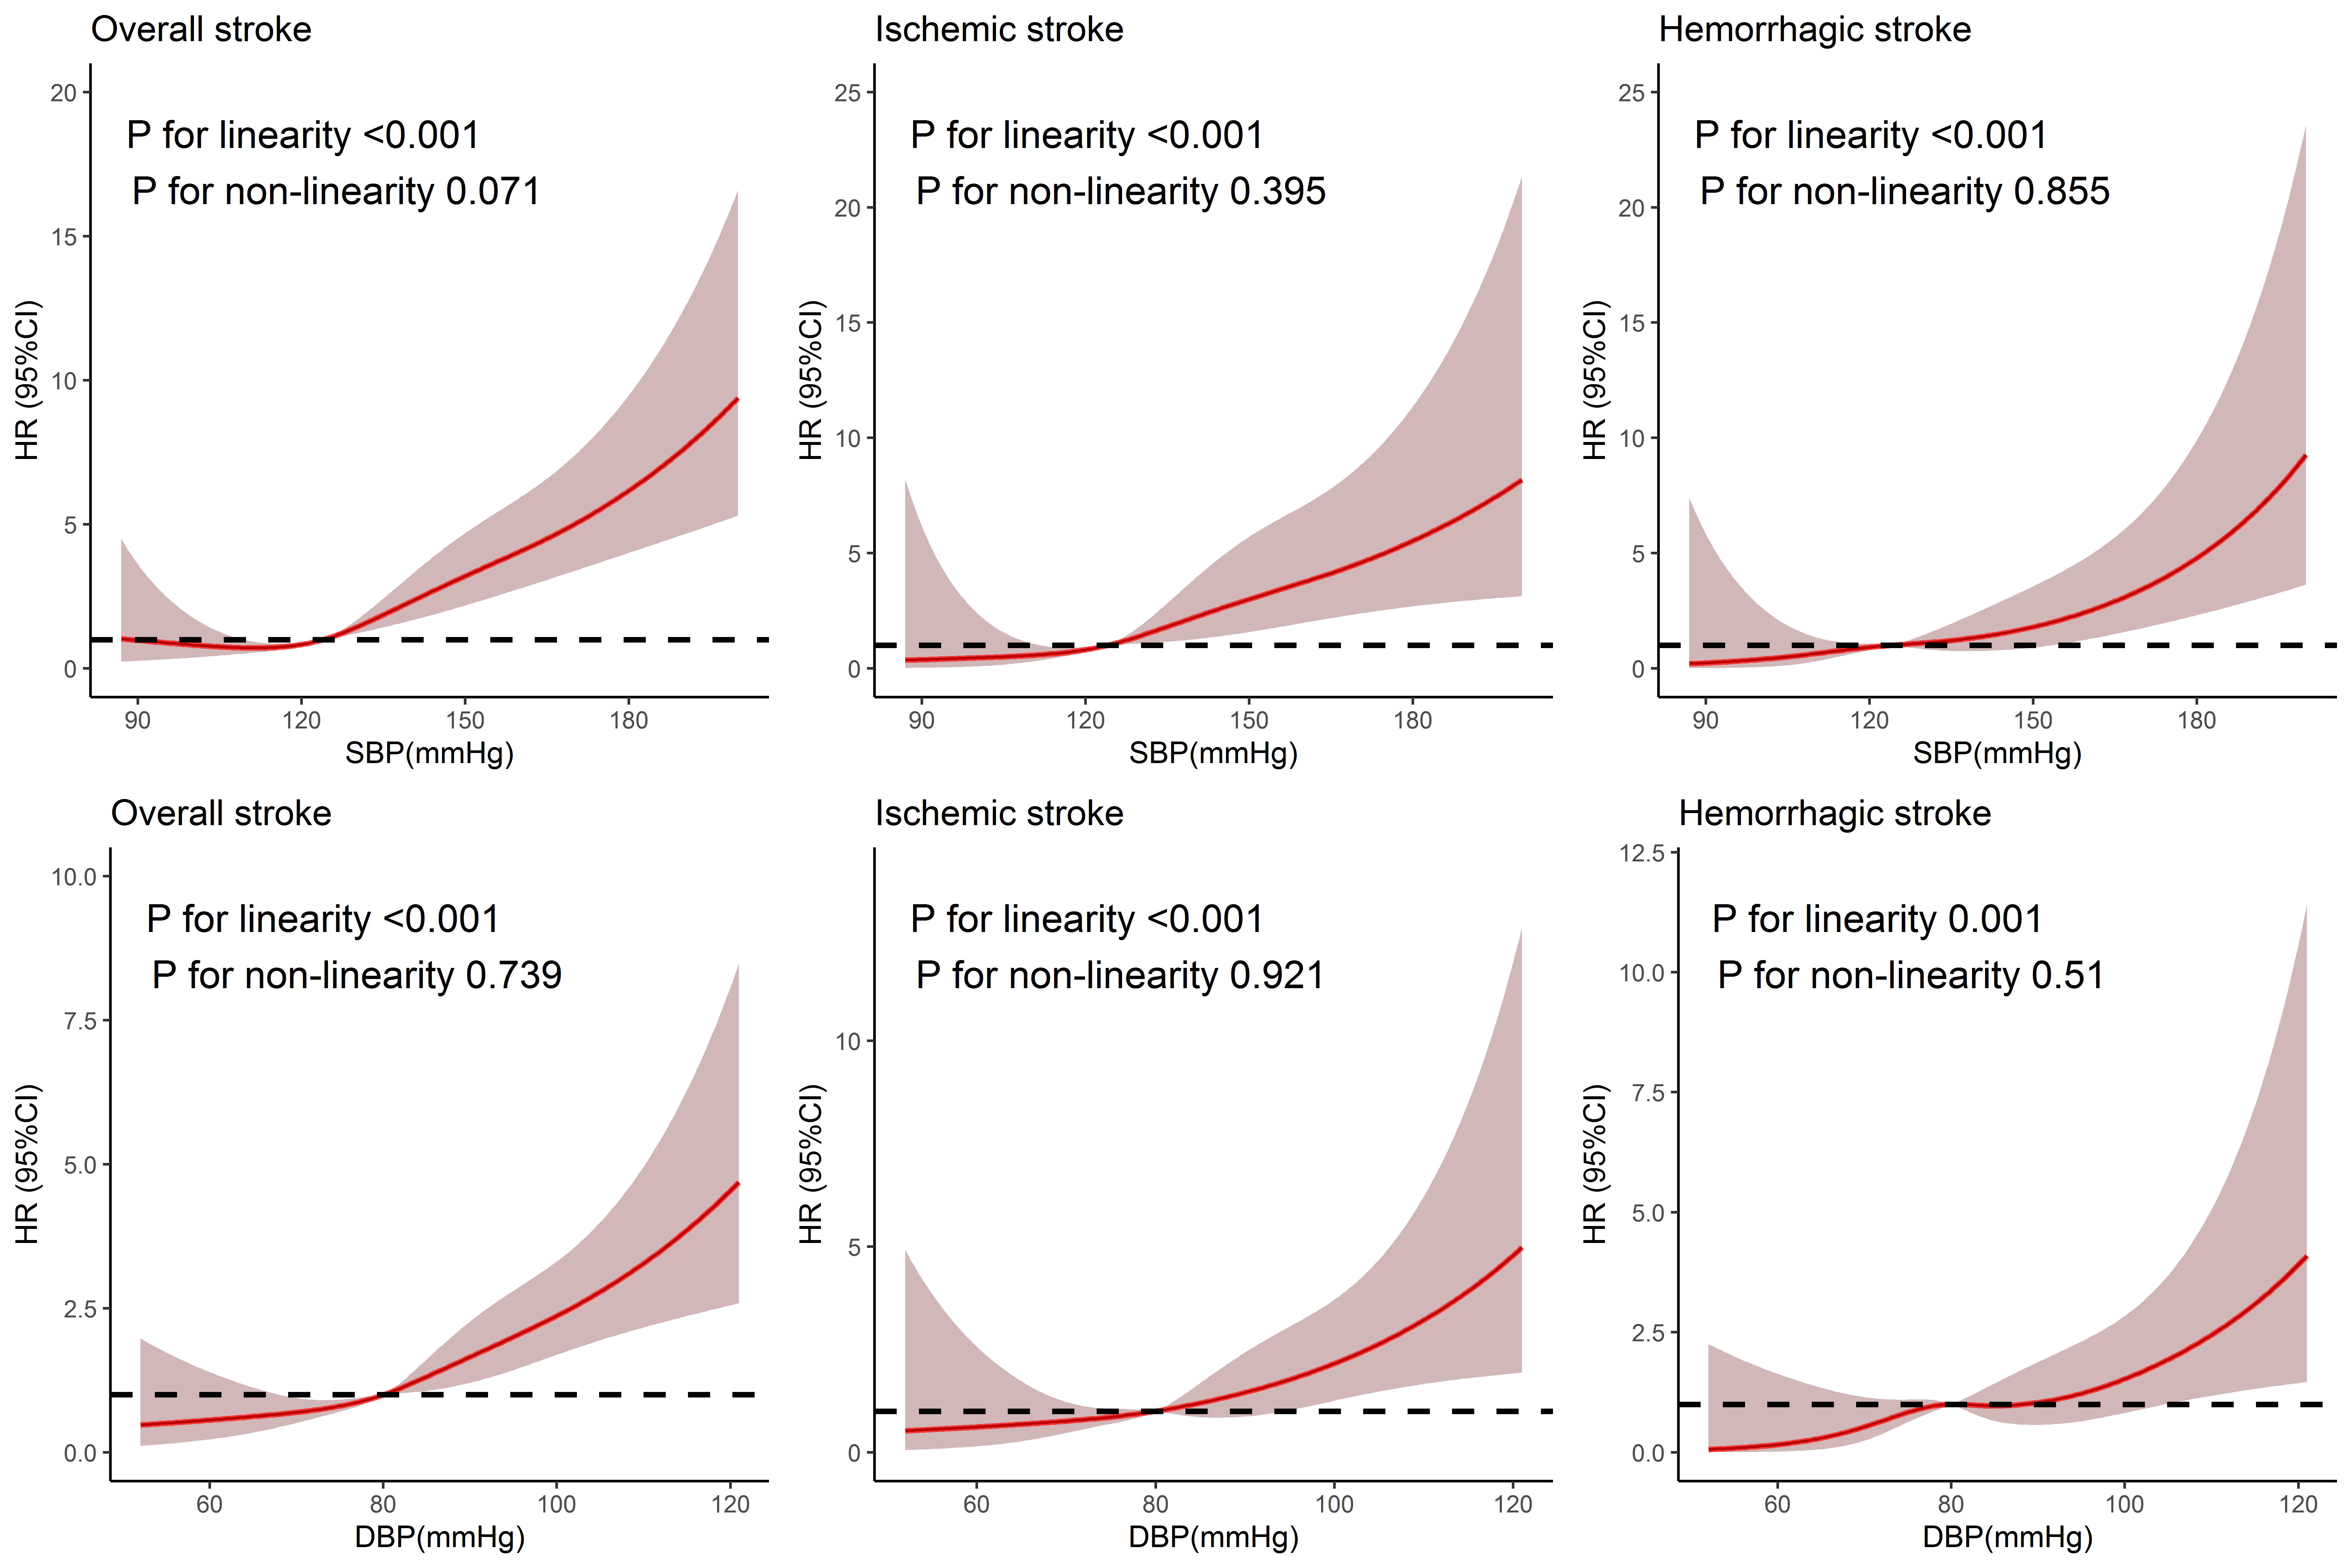


**Figure s1 Association of BP with overall, ischemic and hemorrhagic stroke (model 1)**

Hazard ratios are indicated by solid lines and 95% CI by shaded areas. A reference point is the median value for each SBP and DBP, with knots placed at 5th, 35th, 65th, and 95th centiles of each SBP and DBP. All models were adjusted for age and gender.


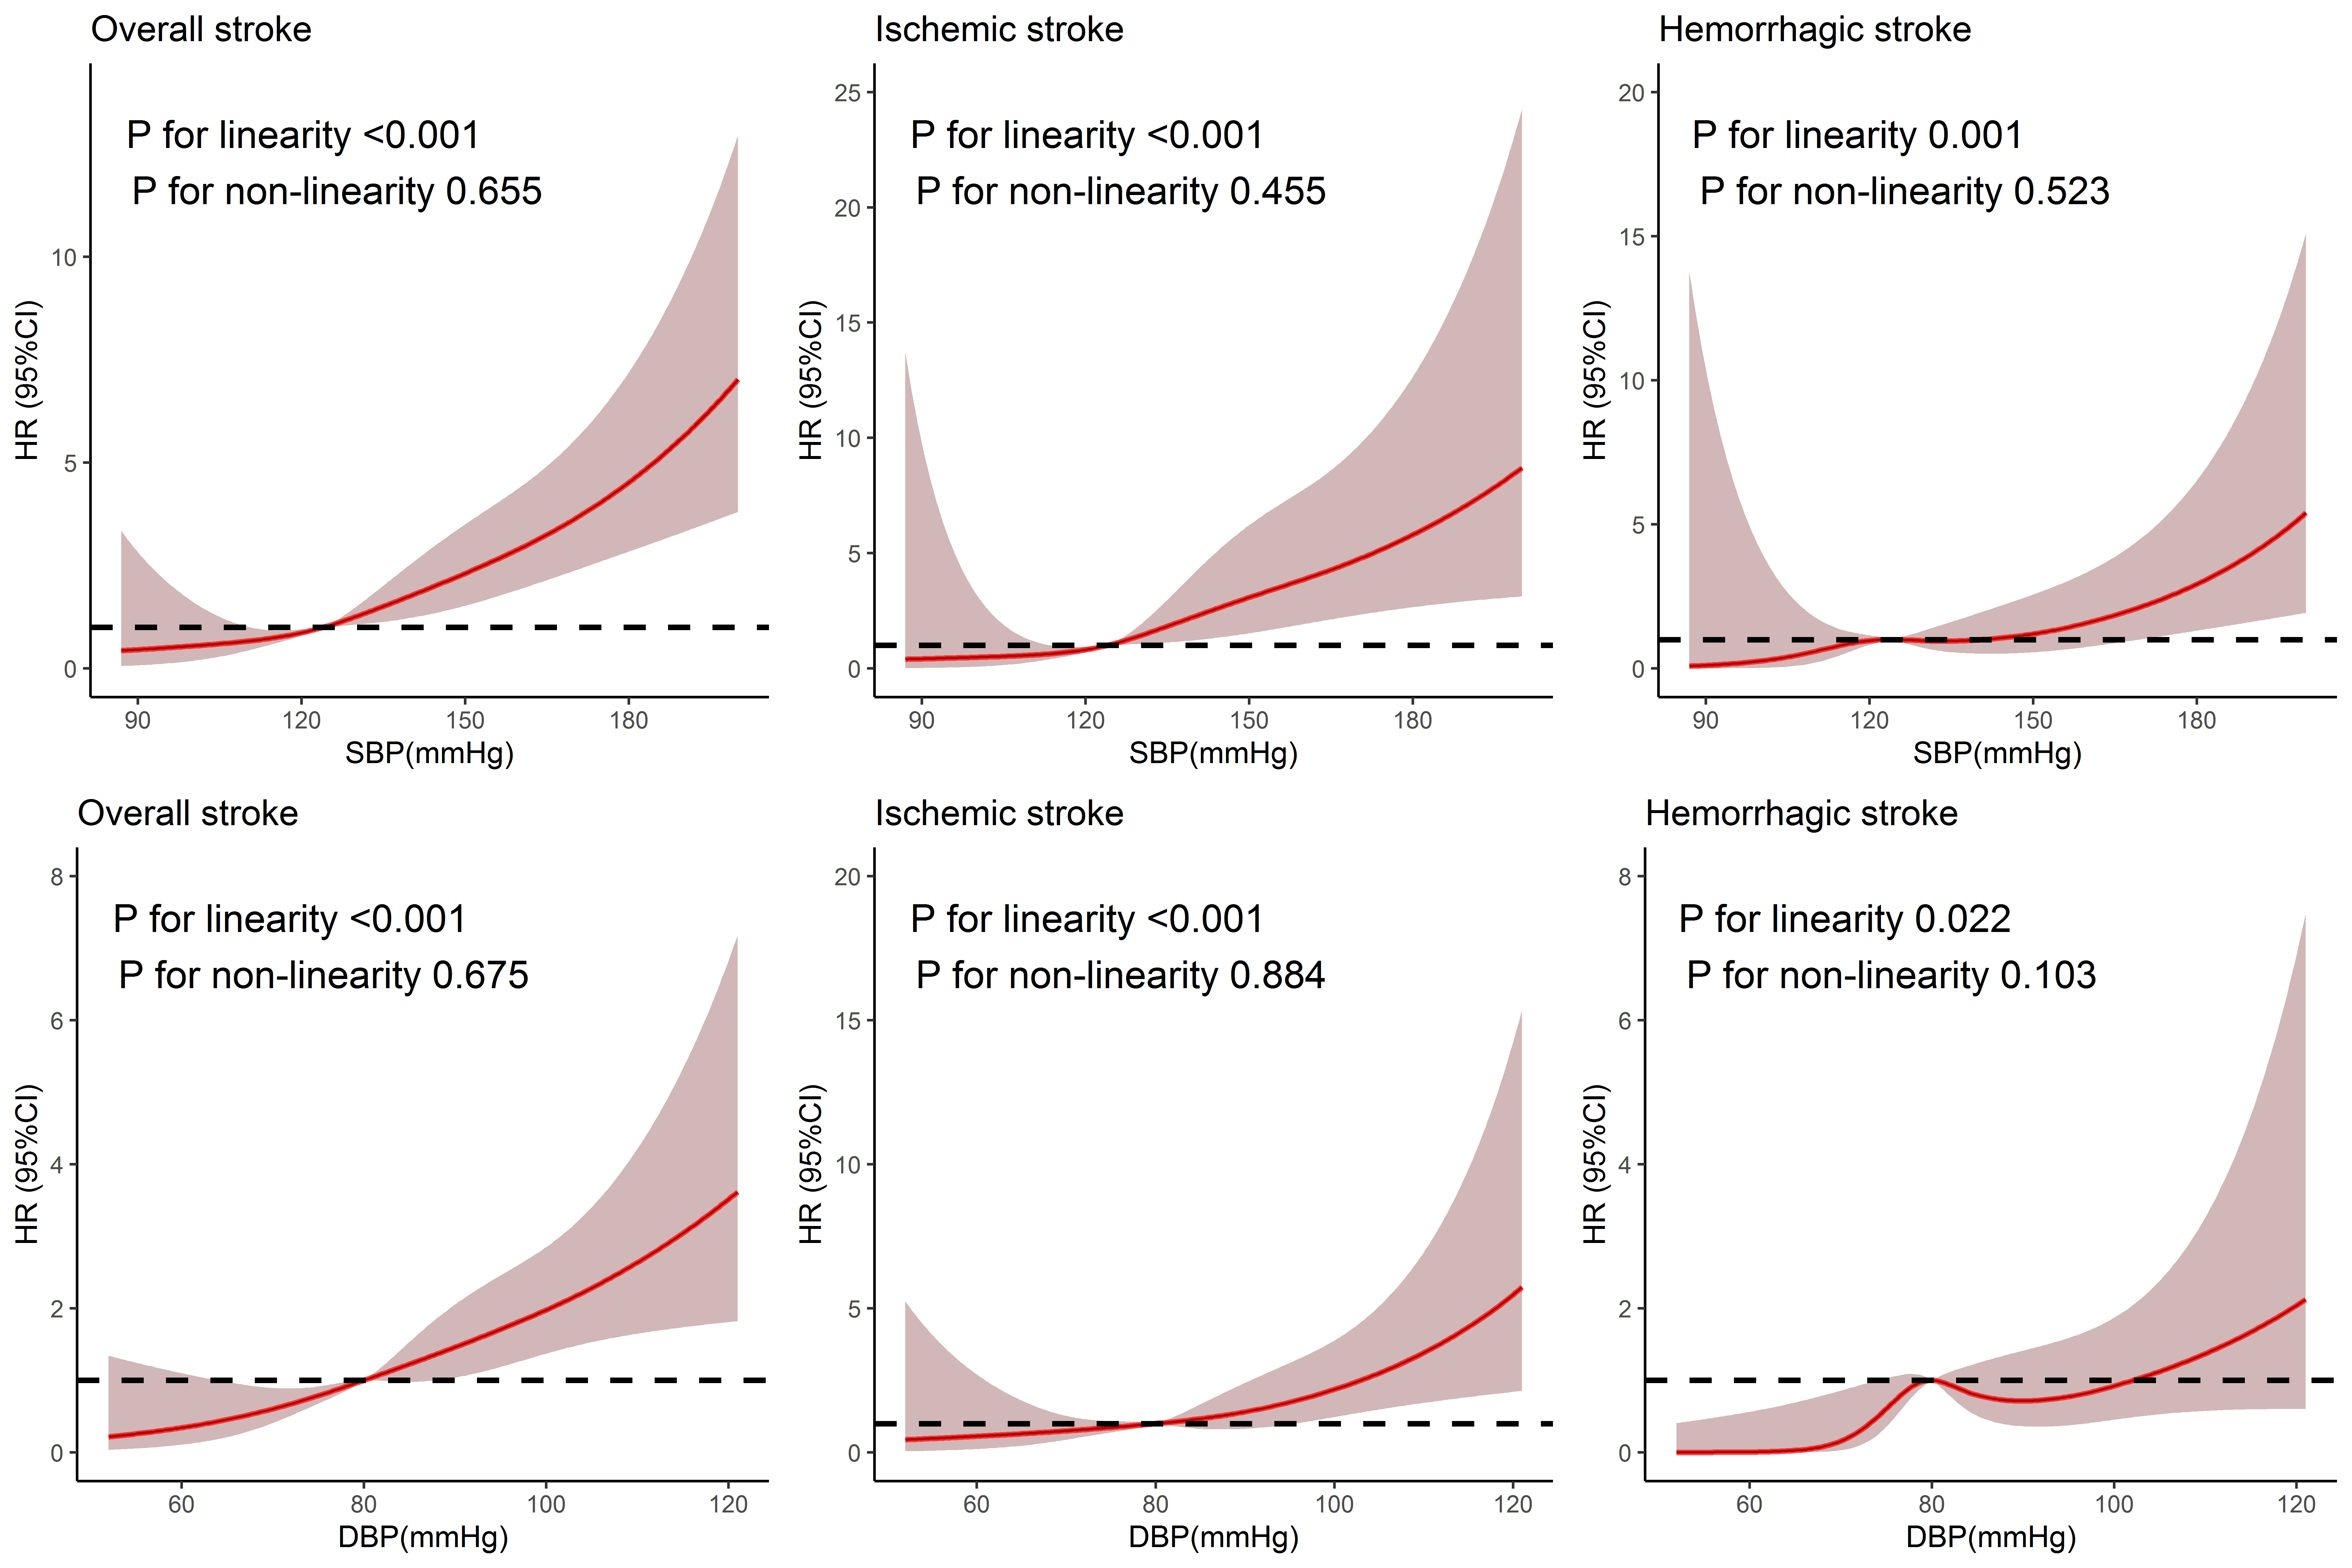


**Figure s2 Association of BP with overall, ischemic and hemorrhagic stroke (model 2)**

Hazard ratios are indicated by solid lines and 95% CI by shaded areas. A reference point is the median value for each SBP and DBP, with knots placed at 5th, 35th, 65th, and 95th centiles of each SBP and DBP. All models were adjusted for age, gender, BMI, TC, smoking status, drinking status, diabetes, CVD history and site.


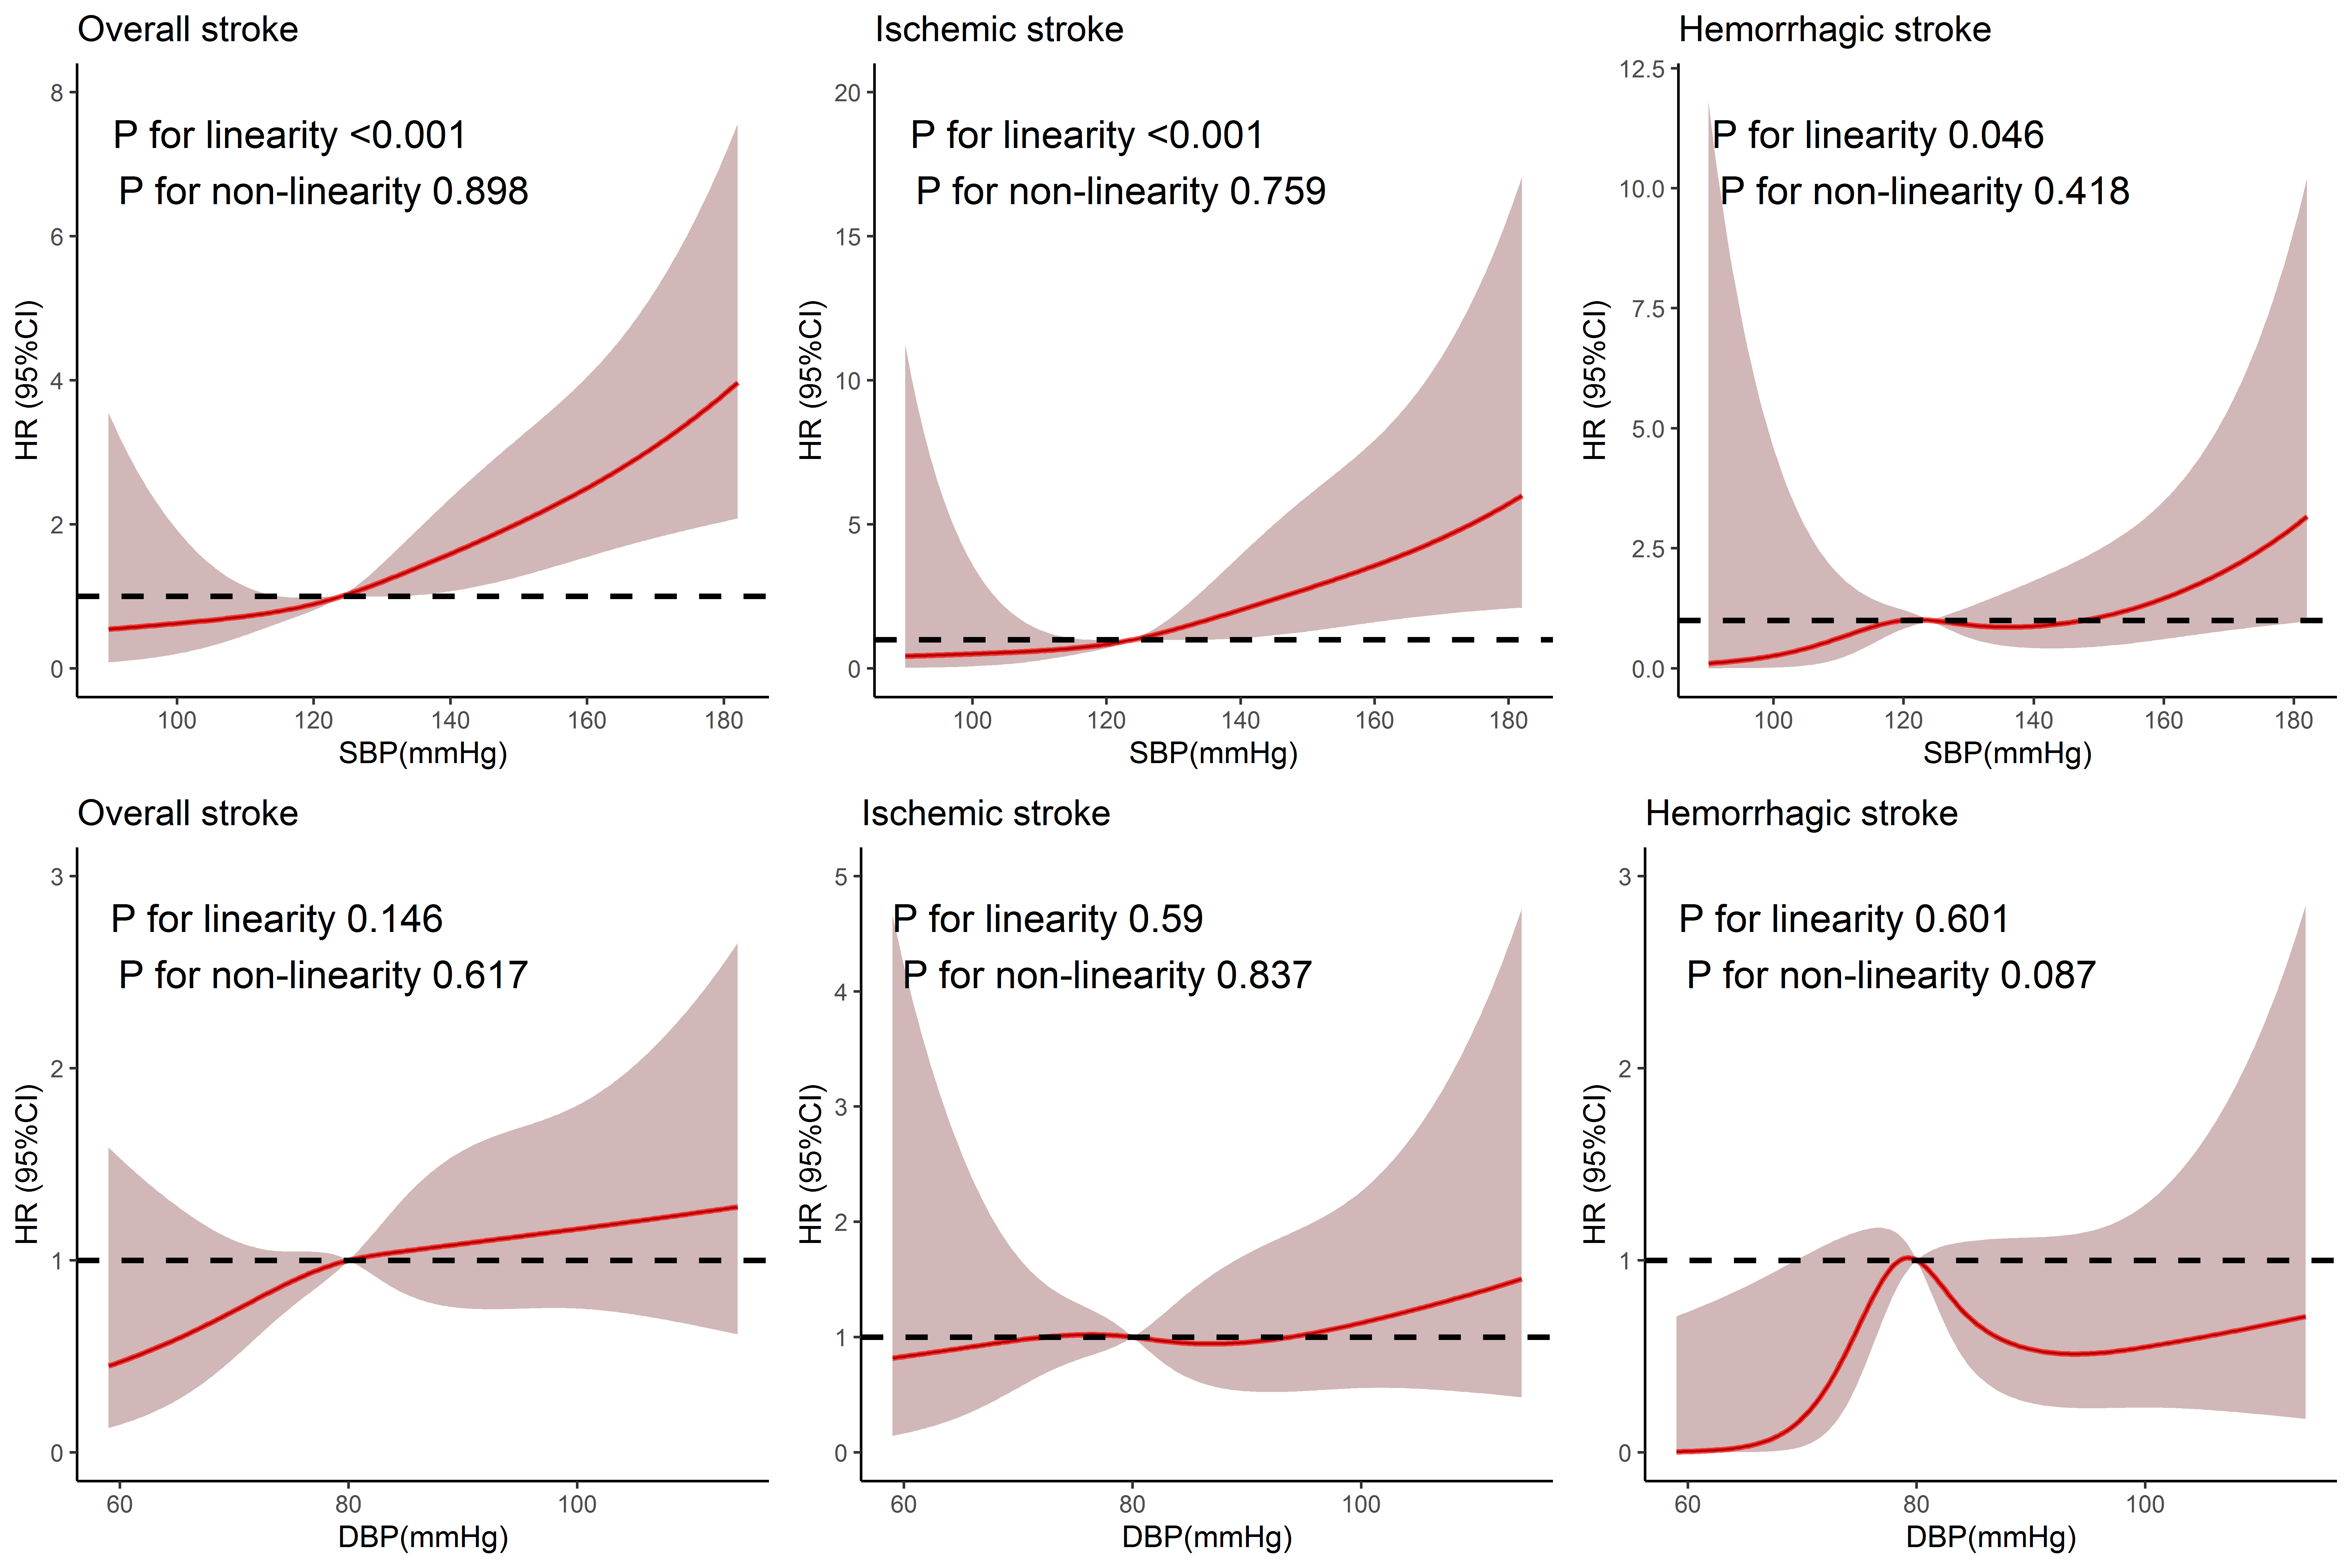


**Figure s3 Association of BP with overall, ischemic and hemorrhagic stroke (model 3, BP winsorized at the 1st/99th)**

Hazard ratios are indicated by solid lines and 95% CI by shaded areas. A reference point is the median value for each SBP and DBP, with knots placed at 5th, 35th, 65th, and 95th centiles of each SBP and DBP. All models were adjusted for age, gender, BMI, TC, smoking status, drinking status, diabetes, CVD history, site and mutually adjusted for SBP and DBP.
